# Supplementary material for: Distribution of α-synuclein in the spinal cord and dorsal root ganglia in an autopsy cohort of elderly persons
Source: Springer Nature journal article supplement (doi:10.1186/s40478-015-0236-9), 2015-09-15
Supplement: MOESM2 [file 25665786]

## Additional file 2: Figure S1

Frequency of intraneuronal cytoplasmic bodies (ICBs) in the large motor neurons at different levels of the ventral horn in symptomatic subjects

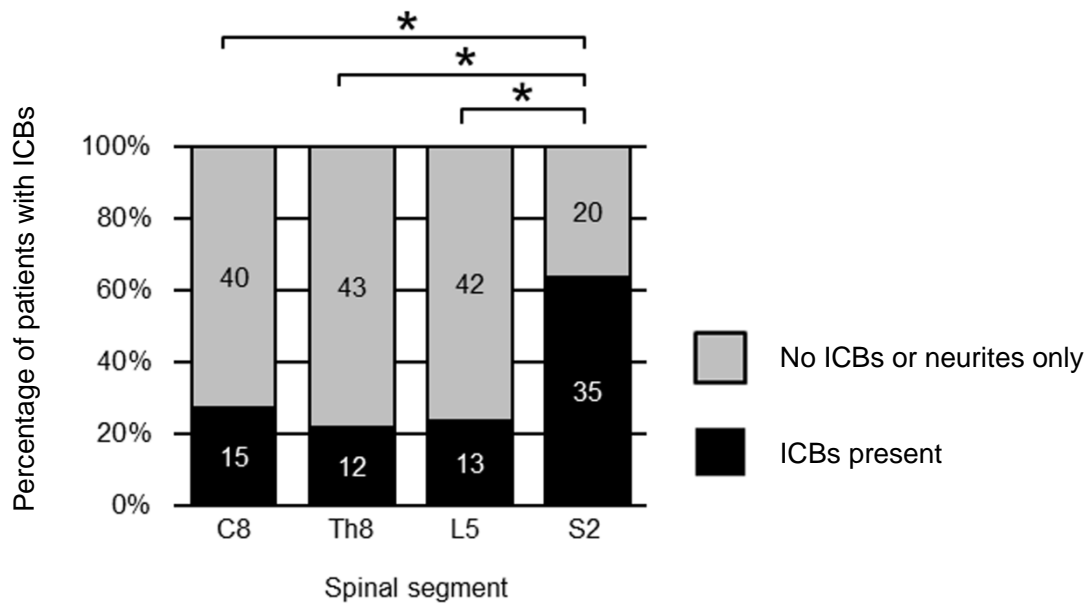

Symptomatic subjects (Parkinson's disease and dementia with Lewy bodies) (n = 55). \*P < 0.01. ICBs, intraneuronal cytoplasmic bodies.
